# Supplementary material for: The Ecdysteroidome of Drosophila: influence of diet and development
Source: Oxford University Press journal article supplement (doi:10.1242/dev.124982), 2015-01-01
Supplement: dev124982supp.pdf [file dev124982supp.pdf]

## Supplementary Figure 1.

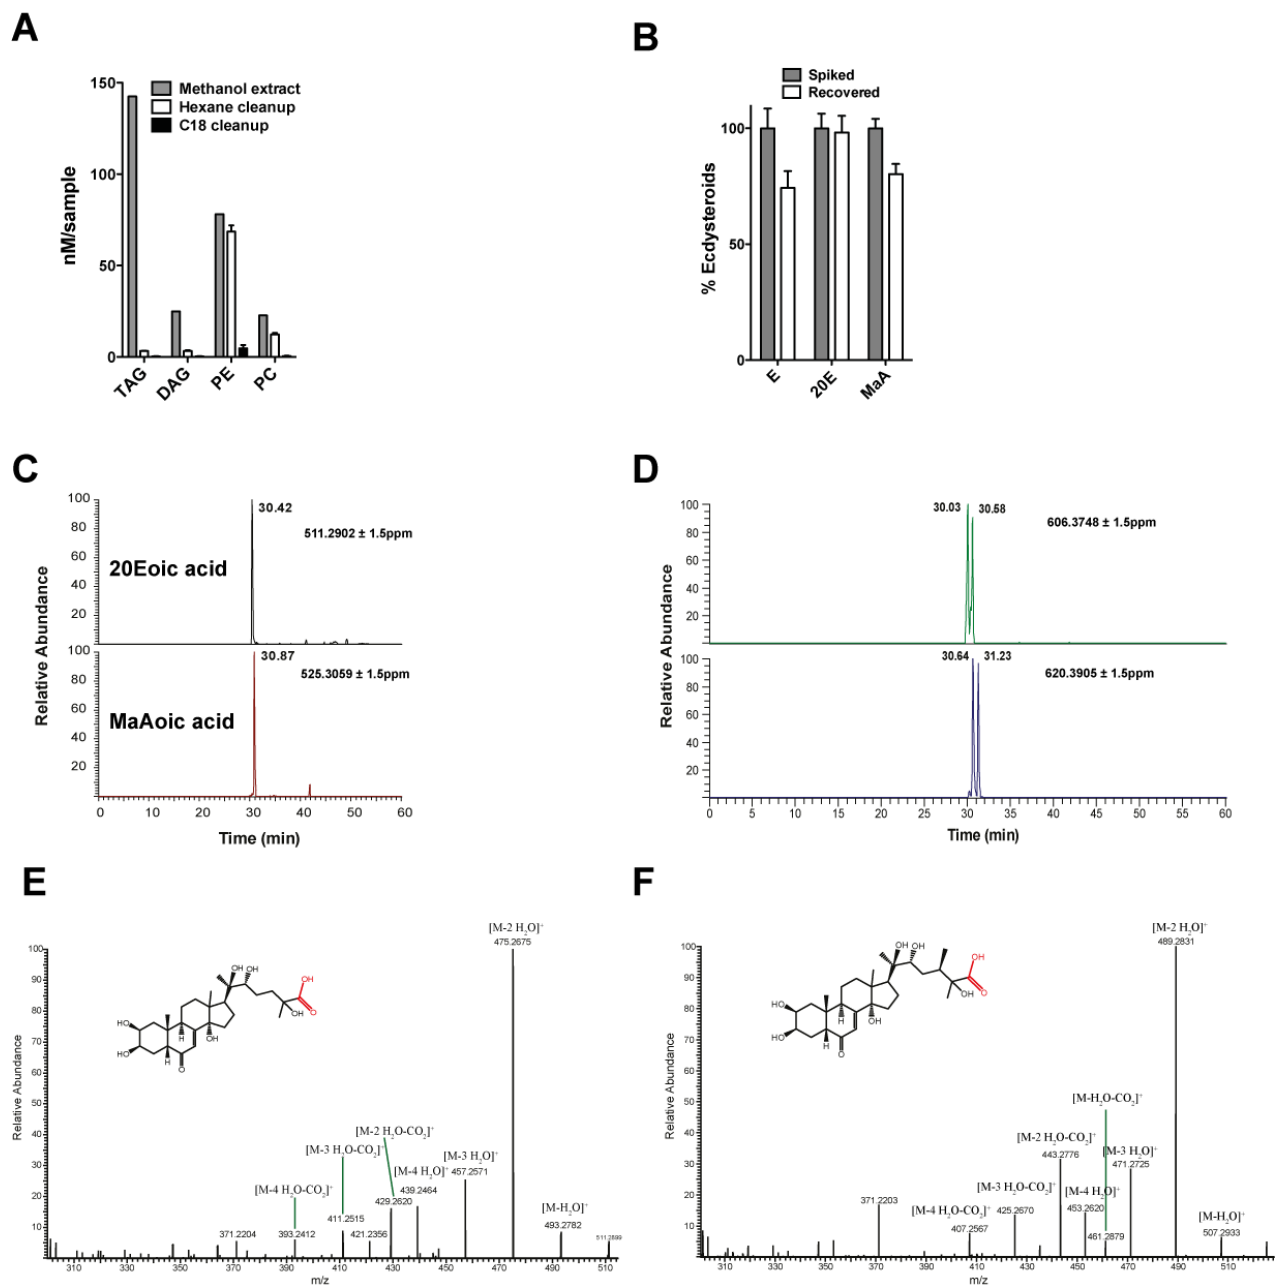

**Supplementary Figure 1** Development of the analytical method and identification of ecdysteroids catabolites. **A:** Partitioning of the cold (4°C) methanol extract against n-hexane and clean-up on a C18 cartridge removes the bulk of both apolar and polar lipids. The amount of lipids in nmols in the extract of five 3<sup>rd</sup> instar larvae is shown at the y-axes. **B:** The absolute recovery of endogenous ecdysteroids was, on average, better than 80% as compared to the unprocessed samples. Adding the internal standard of muristerone C further compensates possible losses. Apart from ecdysteroids, in pupae extracts we also detected two of their catabolites 20E- and MaA-oic acids by *t*-SIM in the native form (C) and as their Girard derivatives (D) and confirmed structural assignments by *t*-MS2 in positive ion mode (E and F) by facile neutral loss of CO<sub>2</sub>.

**Supplementary Figure 2.**

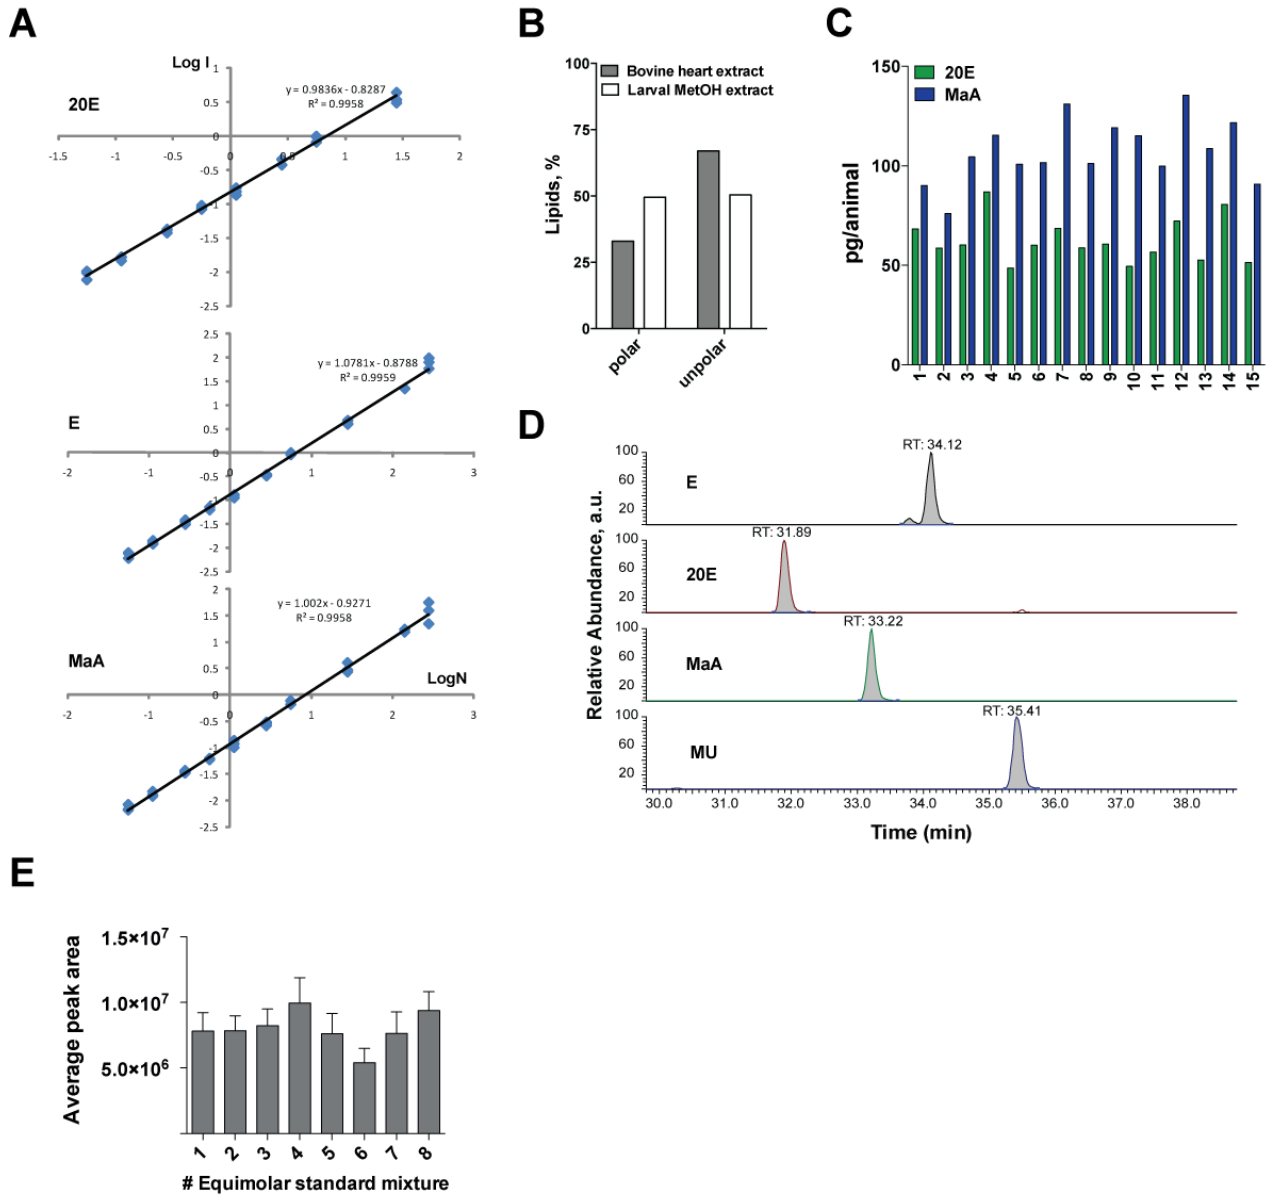

**Supplementary Figure 2** Quantification of endogenous ecdysteroids. **A:** calibration curves for 20E, E and MaA obtained by the method of MRM on a triple quadrupole mass spectrometer. For calibration ecdysteroid standards were mixed into one million fold excess of polar lipid extract from bovine brain used as a surrogate matrix: relative content of polar and apolar lipids. **(B)** in the commercially available ecdysteroid-free bovine heart extract was similar to cold methanol extract from larvae. MRM method was sufficiently sensitive **(C)** to quantify major ecdysteroids 20E and MaA in individual animals at white pupae stage. The method of *t*-SIM on a Q Exactive mass spectrometer was applied to quantify ecdysteroids whose standards were not available. The *t*-SIM analysis of an equimolar mixture of ecdysteroids **(D)** revealed that areas of their XIC peaks differed by less than 15% from the average value **(E)**.

# Supplementary Figure 3.

**A**

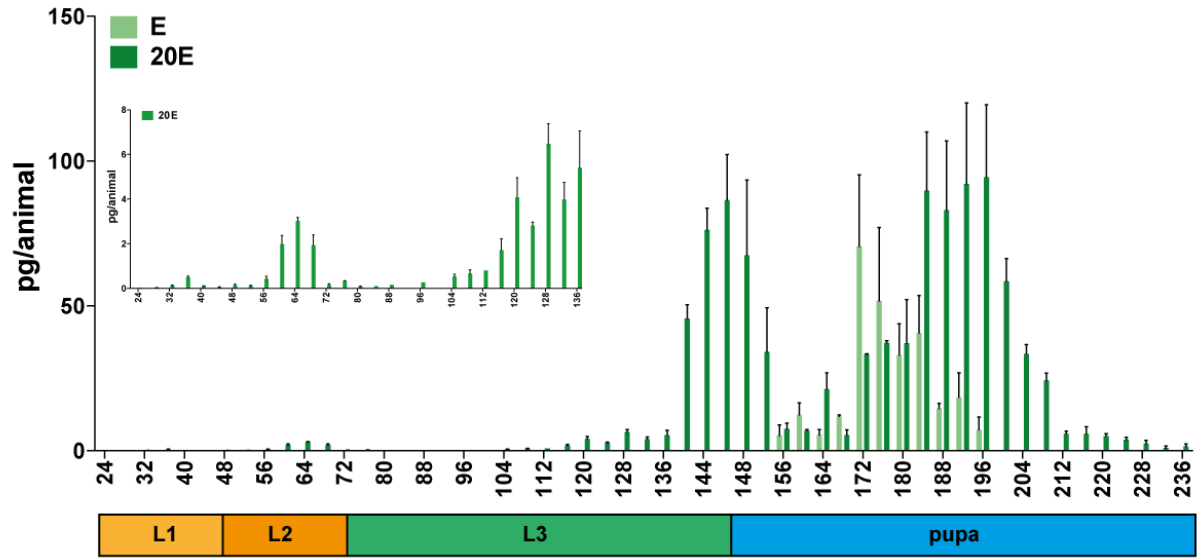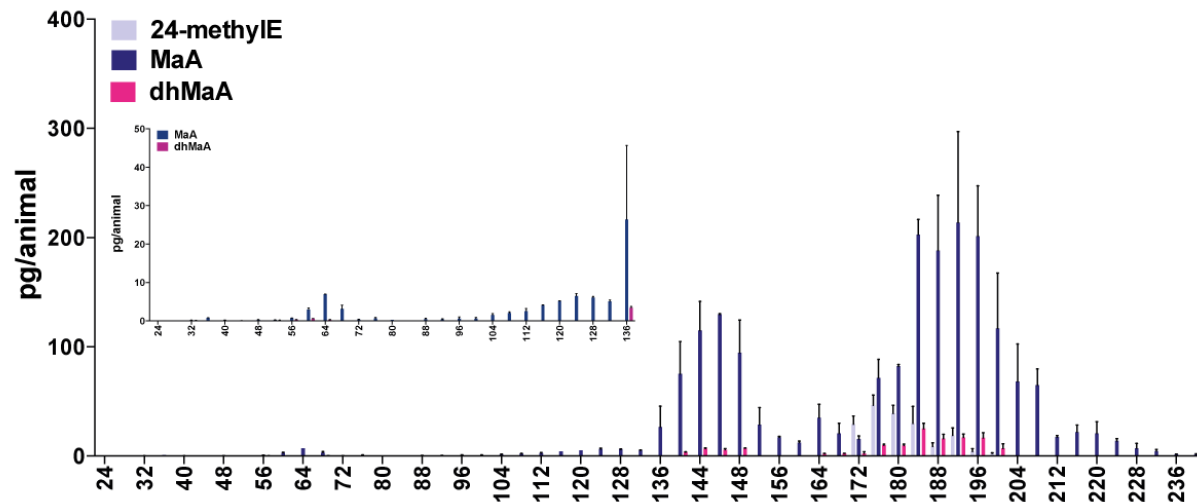

**B**

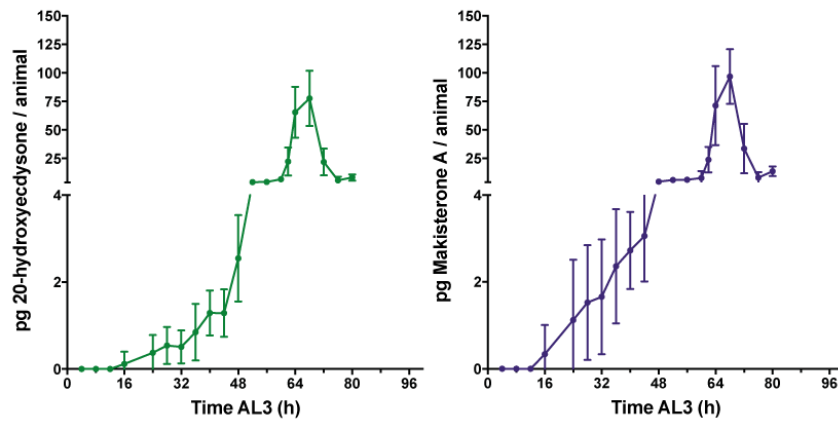

**C**

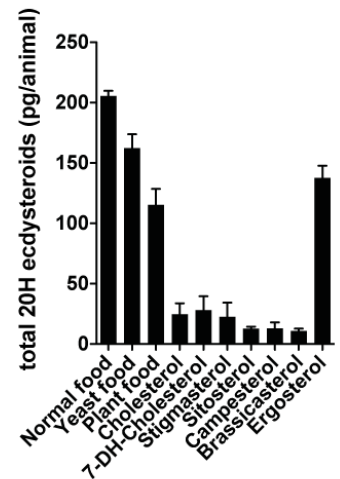

**Supplementary Figure 3.** (A) Alternative display of the time course profile in Figure 2; ecdysteroids content is presented in pg/animal with no further normalizations. (B) Time course of 20E and MaA quantified in *phm-Gal4/+* larvae synchronized at the 2<sup>nd</sup> to 3<sup>rd</sup> instar larval molt (time after L2-L3 transition; AL3) till the early pupal stage. Step increases in ecdysteroid levels preceded the main peak at the pupariation. (C) The total content of 20-hydroxylated ecdysteroids in white pupae reared on complex (normal, yeast and plant) foods and in lipid depleted food spiked with equal amounts of indicated sterols.

## Supplementary Table S1

Target  $m/z$  of putative ecdysteroids and their characteristic fragments used for ecdysteroidome screening by  $t$ -SIM and  $t$ -MS2

| [M+H] <sup>+</sup> | [M-2H <sub>2</sub> O+H] <sup>+</sup> | GiT <sup>1</sup> | GiT-TMA <sup>2</sup> | Core structure <sup>3</sup> | Modification               |
|--------------------|--------------------------------------|------------------|----------------------|-----------------------------|----------------------------|
| 349.2373           | 313.2173                             | 444.3218         | 385.2484             | E                           | hydrocarbon chain cleavage |
| 365.2323           | 329.2123                             | 460.3168         | 401.2434             | E                           | hydrocarbon chain cleavage |
| 449.3262           | 413.3062                             | 544.4107         | 485.3373             | E                           | dehydroxylation            |
| 463.3054           | 427.2854                             | 558.3899         | 499.3165             | E                           | oxidation                  |
| 463.3418           | 427.3218                             | 558.4263         | 499.3529             | methE                       | dehydroxylation            |
| 465.3211           | 429.3011                             | 560.4056         | 501.3322             | E                           | none                       |
| 477.3211           | 441.3011                             | 572.4056         | 513.3322             | methE                       | oxidation                  |
| 477.3575           | 441.3375                             | 572.4420         | 513.3686             | ethyl E                     | dehydroxylation            |
| 479.3003           | 443.2803                             | 574.3848         | 515.3114             | 20E                         | oxidation                  |
| 479.3367           | 443.3167                             | 574.4212         | 515.3478             | E                           | methylation                |
| 479.3367           | 443.3167                             | 574.4212         | 515.3478             | MaA                         | dehydroxylation            |
| 481.3160           | 445.2960                             | 576.4005         | 517.3271             | 20E                         | none                       |
| 491.3367           | 455.3167                             | 586.4212         | 527.3478             | ethyl E                     | oxidation                  |
| 493.3160           | 457.2960                             | 588.4005         | 529.3271             | MaA                         | oxidation                  |
| 493.3524           | 457.3324                             | 588.4369         | 529.3635             | MaC                         | dehydroxylation            |
| 495.2952           | 459.2752                             | 590.3797         | 531.3063             | E                           | carboxylation              |
| 495.3316           | 459.3116                             | 590.4161         | 531.3427             | 20E                         | methylation                |
| 495.3316           | 459.3116                             | 590.4161         | 531.3427             | MaA                         | none                       |
| 497.3108           | 461.2908                             | 592.3953         | 533.3219             | MU                          | none                       |
| 497.3108           | 461.2908                             | 592.3953         | 533.3219             | 20E                         | hydroxylation              |
| 497.3108           | 461.2908                             | 592.3953         | 533.3219             | 20 H                        | hydroxylation              |
| 507.3316           | 471.3116                             | 602.4161         | 543.3427             | MaC                         | oxidation                  |
| 507.3316           | 471.3116                             | 602.4161         | 543.3427             | E                           | acetylation                |
| 509.3108           | 473.2908                             | 604.3953         | 545.3219             | meth E                      | carboxylation              |
| 509.3472           | 473.3272                             | 604.4317         | 545.3583             | 20E                         | ethylation                 |
| 509.3472           | 473.3272                             | 604.4317         | 545.3583             | MaA                         | methylation                |
| 509.3473           | 473.3273                             | 604.4318         | 545.3584             | MaC                         | none                       |
| 511.2902           | 475.2702                             | 606.3747         | 547.3013             | 20E                         | carboxylation              |
| 511.3265           | 475.3065                             | 606.4110         | 547.3376             | MaA                         | hydroxylation              |
| 521.3473           | 485.3273                             | 616.4318         | 557.3584             | meth E                      | acetylation                |
| 523.3265           | 487.3065                             | 618.4110         | 559.3376             | ethyl E                     | carboxylation              |
| 523.3265           | 487.3065                             | 618.4110         | 559.3376             | 20E                         | acetylation                |
| 523.3265           | 487.3065                             | 618.4110         | 559.3376             | E                           | glucosylation              |
| 523.3629           | 487.3429                             | 618.4474         | 559.3740             | MaC                         | methylation                |
| 523.3629           | 487.3429                             | 618.4474         | 559.3740             | MaA                         | ethylation                 |
| 525.3058           | 489.2858                             | 620.3903         | 561.3169             | MaA                         | carboxylation              |

|          |          |          |          |         |                 |
|----------|----------|----------|----------|---------|-----------------|
| 525.3421 | 489.3221 | 620.4266 | 561.3532 | MaC     | hydroxylation   |
| 525.3422 | 489.3222 | 620.4267 | 561.3533 | MaA     | carboxylation   |
| 535.3629 | 499.3429 | 630.4474 | 571.3740 | ethyl E | acetylation     |
| 537.3422 | 501.3222 | 632.4267 | 573.3533 | MaA     | acetylation     |
| 537.3785 | 501.3585 | 632.4630 | 573.3896 | MaC     | ethylation      |
| 539.3214 | 503.3014 | 634.4059 | 575.3325 | MaC     | carboxylation   |
| 539.3215 | 503.3015 | 634.4060 | 575.3326 | 20E     | glucosylation   |
| 545.2779 | 509.2579 | 640.3624 | 581.2890 | E       | sulfation       |
| 545.2874 | 509.2674 | 640.3719 | 581.2985 | E       | phosphorylation |
| 551.3578 | 515.3378 | 646.4423 | 587.3689 | ethyl E | glucosylation   |
| 551.3578 | 515.3378 | 646.4423 | 587.3689 | MaC     | acetylation     |
| 553.3371 | 517.3171 | 648.4216 | 589.3482 | MaA     | glucosylation   |
| 559.2935 | 523.2735 | 654.3780 | 595.3046 | meth E  | sulfation       |
| 559.3030 | 523.2830 | 654.3875 | 595.3141 | meth E  | phosphorylation |
| 561.2728 | 525.2528 | 656.3573 | 597.2839 | 20E     | sulfation       |
| 561.2823 | 525.2623 | 656.3668 | 597.2934 | 20E     | phosphorylation |
| 567.3527 | 531.3327 | 662.4372 | 603.3638 | MaC     | glucosylation   |
| 573.3092 | 537.2892 | 668.3937 | 609.3203 | ethyl E | sulfation       |
| 573.3187 | 537.2987 | 668.4032 | 609.3298 | ethyl E | phosphorylation |
| 575.2884 | 539.2684 | 670.3729 | 611.2995 | MaA     | sulfation       |
| 575.2980 | 539.2780 | 670.3825 | 611.3091 | MaA     | phosphorylation |
| 589.3041 | 553.2841 | 684.3886 | 625.3152 | MaC     | sulfation       |
| 589.3136 | 553.2936 | 684.3981 | 625.3247 | MaC     | phosphorylation |
| 627.3739 | 591.3539 | 722.4584 | 663.3850 | E       | glucosylation   |
| 641.3895 | 605.3695 | 736.4740 | 677.4006 | meth E  | glucosylation   |
| 643.3688 | 607.3488 | 738.4533 | 679.3799 | 20E     | glucosylation   |
| 655.4052 | 619.3852 | 750.4897 | 691.4163 | ethyl E | glucosylation   |
| 657.3845 | 621.3645 | 752.4690 | 693.3956 | MaA     | glucosylation   |
| 671.3527 | 635.3327 | 766.4372 | 707.3638 | MaC     | glucosylation   |

<sup>1</sup> [M+H]<sup>+</sup> ion of the dehydrated GirardT derivative (Lavrynenko et al, 2013)

<sup>2</sup> characteristic fragment produced by TEA neutral loss from the dehydrated GirardT derivative

<sup>3</sup> core ecdysteroid molecule subjected to the indicated modification

**Supplementary Table S2**

Standards of ecdysteroid conjugates used for validating ecdysteroidome screening by LC-MS/MS<sup>1</sup>

|    |                     |
|----|---------------------|
| 1  | Silenoside A        |
| 2  | 20E-2-glucoside     |
| 3  | 20E-3-glucoside     |
| 4  | 20E-25-glucoside    |
| 5  | 20E-22-palmitat     |
| 6  | E-22-palmitoleat    |
| 7  | E-22-palmitat       |
| 8  | E-22-oleat          |
| 9  | dehydro-E-sulphate  |
| 10 | dehydro-E-phosphate |

<sup>1</sup> Four glycoside conjugates of 20-hydroxyecdysone at C2; C3; C25 position and silenoside A were kind gifts from Dr. Juraj Harmatha (Institute of Organic Chemistry and Biochemistry, Prague) and Dr. Z Saatov (Institute of Chemistry of Plant Substances, Tashkent), respectively. Dehydro-ecdysone-sulfate and dehydro-ecdysone-phosphate were synthesized from ecdysone as described (Ikeda et al., 1995; Pis et al., 1995); 22-palmitate – and 22-oleate- according to (Dinan, 1988).

**Supplementary Table S3**

Mass transitions and instrument settings for the detection of major ecdysteroids by the method of multiple reaction monitoring (MRM) on a triple quadrupole mass spectrometer TSQ Vantage.

| Ecdysteroid        | Precursor ion, $m/z$ | Fragment ion, $m/z$ | CE, eV | S-lens, V |
|--------------------|----------------------|---------------------|--------|-----------|
| E                  | 465.32               | 109.23              | 28     | 116       |
|                    | 465.32               | 429.43              | 13     | 116       |
| 20E                | 481.32               | 371.29              | 17     | 138       |
|                    | 481.32               | 445.43              | 14     | 138       |
| MaA                | 495.32               | 371.29              | 15     | 148       |
|                    | 495.32               | 459.43              | 14     | 148       |
| MU                 | 497.32               | 297.21              | 21     | 145       |
|                    | 497.32               | 425.36              | 16     | 145       |
| MethE <sup>1</sup> | 479.32               | 359.22              | 15     | 140       |
|                    | 479.32               | 443.32              | 14     | 140       |
| dhMaA <sup>1</sup> | 493.32               | 439.28              | 20     | 148       |
|                    | 493.32               | 457.29              | 14     | 148       |

<sup>1</sup> Settings were not optimized using standards



### Supplementary Table S4

Number of animals collected at different time points for quantifying ecdysteroids during the development time course (Figure 2 and Supplementary Figure 3A)

| Time of collection, hours <sup>1</sup> | Number of collected animals <sup>2</sup> |
|----------------------------------------|------------------------------------------|
| 0-12                                   | 200                                      |
| 16-20                                  | 150                                      |
| 24-28                                  | 100                                      |
| 32-36                                  | 80                                       |
| 40-44                                  | 50                                       |
| 48-52                                  | 30                                       |
| 56                                     | 20                                       |
| 60                                     | 15                                       |
| 64-72                                  | 10                                       |
| 76 und later                           | 6                                        |

<sup>1</sup>hours after embryos hatching

<sup>2</sup>the volume of collected embryos was approximately equivalent to the volume of 200 larvae at the 1<sup>st</sup> instar

## SUPPLEMENTARY METHODS

### *Separation of ecdysteroids by microflow LC*

HPLC was performed on Agilent 1200 system (Agilent, Santa Clara CA) equipped with a trap column (OPTI-PAK, 1 $\mu$ L, C18) from Dichrom GmbH (Marl, Germany) that was mounted in-line to a 0.5 mm x 150 mm analytical column packed with Zorbax SB-C18 5 $\mu$ m from Agilent. The mobile phase delivered at the flow rate of 10  $\mu$ l/min consisted of solvent A: 0.1% aqueous formic acid; solvent B: 0.1% formic acid in neat acetonitrile. Gradient elution program delivered in 60 min was: holding 5% of B for 10 min until 30  $\mu$ l sample was loaded and concentrated at the trap column; then computer-steered valve switched the system from on-line concentration to gradient elution and the concentration of solvent B ramped from 15% to 30% of B between 11 and 30 min; step increased to 100% of B in one min and hold for 9 min; stepped down to 5% in one minute and hold for 19 min for equilibrating the system to starting conditions. After 5 successive analyses of extracts 30  $\mu$ L of ecdysteroid standards mixture of MuA, E, 20E, MaA, each with the concentration of 2.5 nM was injected as a quality control.

### *MRM quantification of ecdysteroids*

LC-MS/MS was performed on a TSQ Vantage triple quadrupole instrument (Thermo Fisher Scientific, San Jose CA) equipped with a H-ESI ion source operated under spray voltage of 2.7 kV; 5 psi of sheath gas pressure of 5 psi; auxiliary gas set at 2 arbitrary units; vaporizer temperature 50<sup>0</sup>C; transfer capillary temperature 200<sup>0</sup>C. S-lens offset and collision energy were optimized for detecting E, MaA, 20E and MuA using standards solution in the direct infusion mode. Quantification relied on the two simultaneously monitored mass transitions between [M+H]<sup>+</sup> precursor and the characteristic fragment ions. One transition acquired at the low collision energy (CE) (<10 eV) used the abundant fragment produced from the precursor ion by the loss of two water molecules and served as a quantifier. Another transition was acquired at higher (>25 eV) CE and either used steroid rings fragment in 20E, MaA, MuA or aliphatic chain fragment in E and served as a qualifier (Supplementary Table S3).

The width of transmission mass windows of Q1 and Q3 quadrupoles was set to 0.7 Da; duty cycle 3s; collision cell gas pressure (argon) 1 mTorr. Spectra were processed by QualBrowser software from Xcalibur 2.2; chromatographic peaks were integrated using Genesis algorithm with 5-points Gaussian smoothing.

To prepare the ecdysteroid calibration samples, we used more than a million-fold excess of commercial bovine heart lipid extract as an ecdysteroid-free surrogate matrix (see Supplementary Figure S1).

### *Profiling ecdysteroidome composition on a Q Exactive mass spectrometer*

Extracts from embryos, early 3<sup>rd</sup> instar larvae, early pupa (40 h APF), late pupa (68 h APF) and female adults were prepared and processed as above, however from 10-fold higher amount of starting material. The extract was first analyzed in high resolution MS mode and

candidate masses were retrieved by matching against the full list of masses of putative ecdysteroids (Supplementary Table S1) with  $\pm 1.5$  ppm accuracy. Then the LC-MS/MS analysis was repeated such that these candidate masses were detected by *t*-SIM mode and subjected to *t*-MS2 fragmentation under 10 eV collision energy (CE). The abundance of fragment ions yielded by the loss of two water molecules was monitored at the extracted ion chromatogram (XIC) profiles.

A separate portion of each extract was treated with Girard T reagent as described in (Lavrynenko et al., 2013) and analyzed as described above, however in MS and *t*-SIM experiments the abundance of precursor ions corresponding to dehydrated Girard T-derivatization products (Supplementary Table S1), and in *t*-MS2 experiments the abundance of trimethylamine loss fragments (CE = 40 eV) was monitored.

### ***Lipid quantification in larvae extracts***

Aliquot of 5  $\mu$ l of the methanol extracts were re-dissolved in 45  $\mu$ l of 5 mM ammonium acetate in *iso*-propanol/methanol/chloroform 4/2/1 (v/v/v) containing 0.56  $\mu$ M of the lipid standards PE 34:0 and PC 34:0. Lipids were identified and quantified by shotgun analyses on a Q Exactive tandem mass spectrometer (Thermo Fisher Scientific, Bremen, Germany) as described in (Carvalho et al., 2012) using LipidXplorer software (Herzog et al., 2011).

### ***Ecdysteroids quantification on a hybrid tandem mass spectrometer Q Exactive***

Extracts from animals corresponding to 162 h to 268 h were re-injected subjected to LC-MS analyses on Q Exactive in *t*-SIM mode using inclusion list in Supplementary Table S1. The target mass resolution of the Orbitrap  $R_{m/z=200}$  of 70,000; automated gain control (AGC) was  $10^5$  and maximum injection time of 200 ms; the width of transmission window of the quadrupole was 1.0 Da; *m/z*. 445.1200 ( $[C_2H_6SiO]_6$ ) (Keller et al., 2008) was used as a lock mass. XIC traces of individual ecdysteroids were produced by Xcalibur 2.2 software using 2 ppm mass accuracy; peak areas were calculated using 5-points Gaussian smoothing.

### ***Monitoring polar ecdysteroids by LC-MS/MS***

Polar conjugates of ecdysteroids (including acidic conjugates with phosphate and sulphate moieties) were detected by the same LC-MS/MS method as native unconjugated ecdysteroids as  $[M+H]^+$  molecular ions at the similar level of sensitivity. The sample preparation and detection methods were validated by analyzing 10 standards of various ecdysteroid conjugates (Supplementary Table S2).

### ***Quantification of the total content of ecdysteroids conjugates with fatty acid moieties***

Larvae were extracted with chloroform / methanol by the method of Folch *et al* (Folch, 1957) and dried extracts were subjected to mild alkaline hydrolysis with 50 mM methanolic NaOH, which

quantitatively cleaves fatty acid conjugates, leaving MaA and 20E intact. Alkaline treatment did not noticeably increase ecdysteroid concentration compared to untreated methanol extracts.

## SUPPLEMENTARY REFERENCES

**Carvalho, M., Sampaio, J. L., Palm, W., Brankatschk, M., Eaton, S. and Shevchenko, A.** (2012). Effects of diet and development on the *Drosophila* lipidome. *Mol Syst Biol* **8**, 600.

**Dinan, L.** (1988). The chemical synthesis of ecdysone 22-long-chain fatty acyl esters in high yield. *J Steroid Biochem* **31**, 237-245.

**Folch, J. M., Lees, M., Sloane-Stanley, G. H.** (1957). A simple method for the isolation and purification of total lipids from animal tissue. *J. Biol. Chem.* **226**, 497-509.

**Herzog, R., Schwudke, D., Schuhmann, K., Sampaio, J. L., Bornstein, S. R., Schroeder, M. and Shevchenko, A.** (2011). A novel informatics concept for high-throughput shotgun lipidomics based on the molecular fragmentation query language. *Genome Biol* **12**, R8.

**Ikeda, M., Fujita, T., Naoki, H., Naya, Y., Mamiya, Y., Kamba, M. and Sonobe, H.** (1995). Charge-remote fragmentation of ecdysteroids conjugated with phosphoric acid. *Rapid Commun Mass Spectrom* **9**, 1480-1483.

**Keller, B. O., Sui, J., Young, A. B. and Whittal, R. M.** (2008). Interferences and contaminants encountered in modern mass spectrometry. *Anal Chim Acta* **627**, 71-81.

**Pis, J., Girault, J. P., Grau, V. and Lafont, R.** (1995). Analysis of ecdysteroid conjugates: chromatographic characterization of sulfates, phosphates and glucosides *Eur J Entomol* **92**, 41-50.
